# Supplementary material for: Nomogram to predict overall survival based on the log odds of positive lymph nodes for patients with endometrial carcinosarcoma after surgery
Source: Springer Nature journal article supplement (doi:10.1186/s12885-021-08888-0), 2021-10-26

# Nomogram

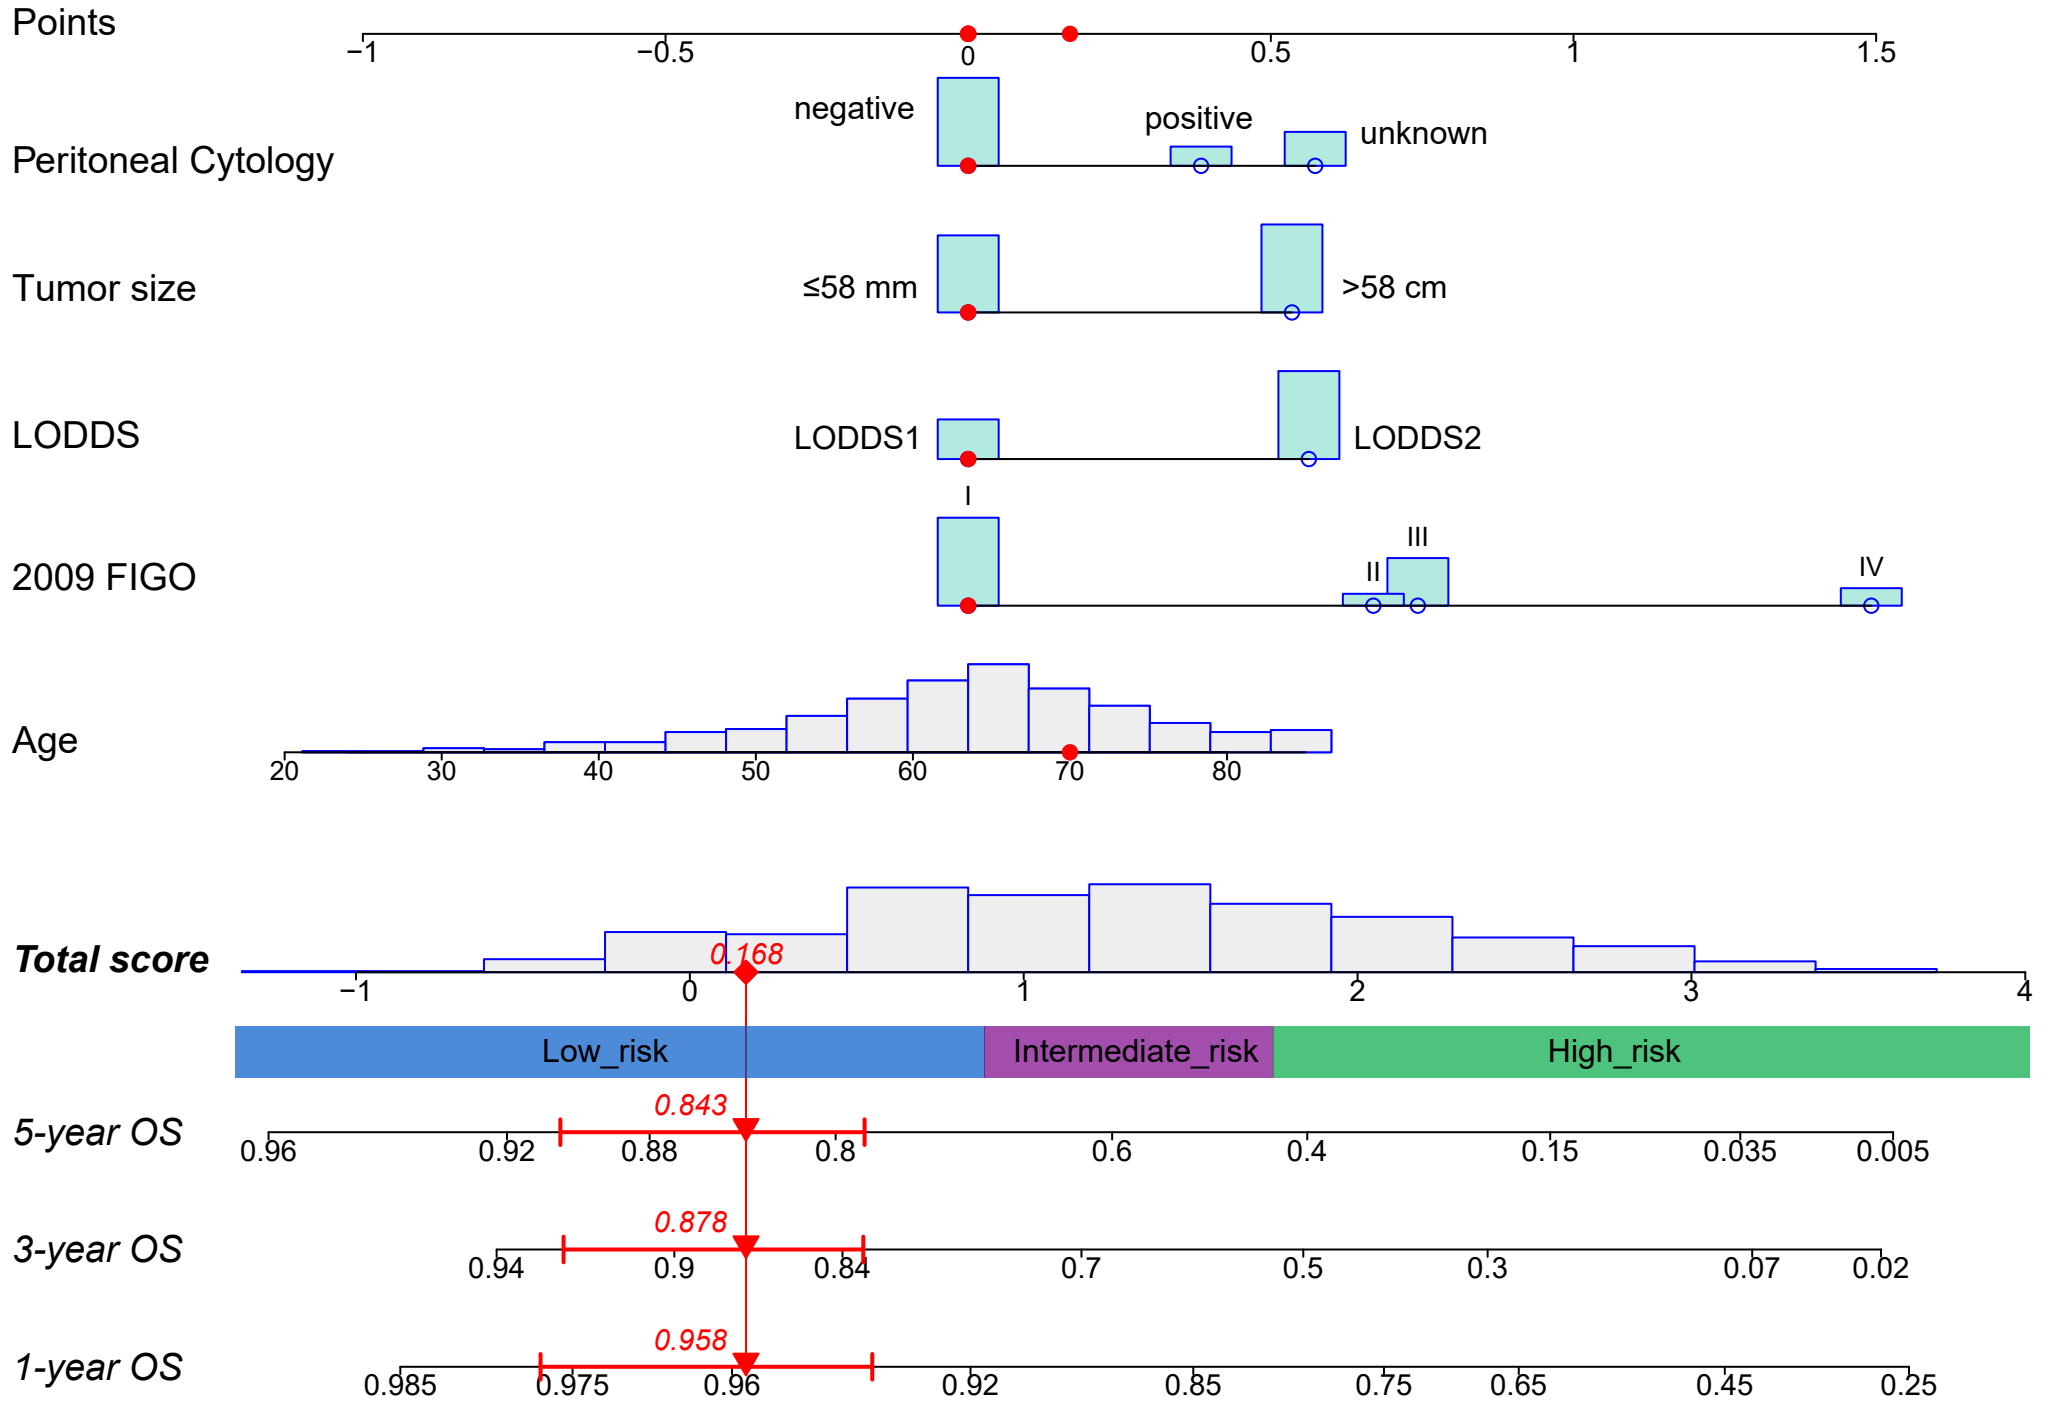

Supplement: MOESM1 [file 19796268]
